# Supplementary material for: Proinflammatory macrophage-derived microvesicles exhibit tumor tropism dependent on CCL2/CCR2 signaling axis and promote drug delivery via SNARE-mediated membrane fusion
Source: PubMed Central journal article supplement (PMC7295053; doi:10.7150/thno.45528), 2020-05-17
Supplement: thnov10p6581s1.pdf [file thnov10p6581s1.pdf]

**Proinflammatory macrophage-derived microvesicles exhibit tumor tropism dependent on CCL2/CCR2 signaling axis and promote drug delivery *via* SNARE-mediated membrane fusion**

*Ling Guo<sup>1,2</sup>, Ye Zhang<sup>1,2</sup>, Runxiu Wei<sup>1,2</sup>, Xiaochen Zhang<sup>1,2</sup>, Cuifeng Wang<sup>\*1,2</sup>, Min Feng<sup>\*1,2</sup>*

<sup>1</sup>School of Pharmaceutical Sciences, Sun Yat-sen University, University Town, Guangzhou, 510006, P.R. China

<sup>2</sup>Guangdong Provincial Key Laboratory of Chiral Molecule and Drug Discovery, School of Pharmaceutical Science, Sun Yat-sen University, Guangzhou, 510006, P.R. China

\*Corresponding authors: Tel.: +8620 39943073; fax: +8620 39943073

Email address: wangcf6@mail.sysu.edu.cn and fengmin@mail.sysu.edu.cn

## SUPPLEMENTARY FIGURES

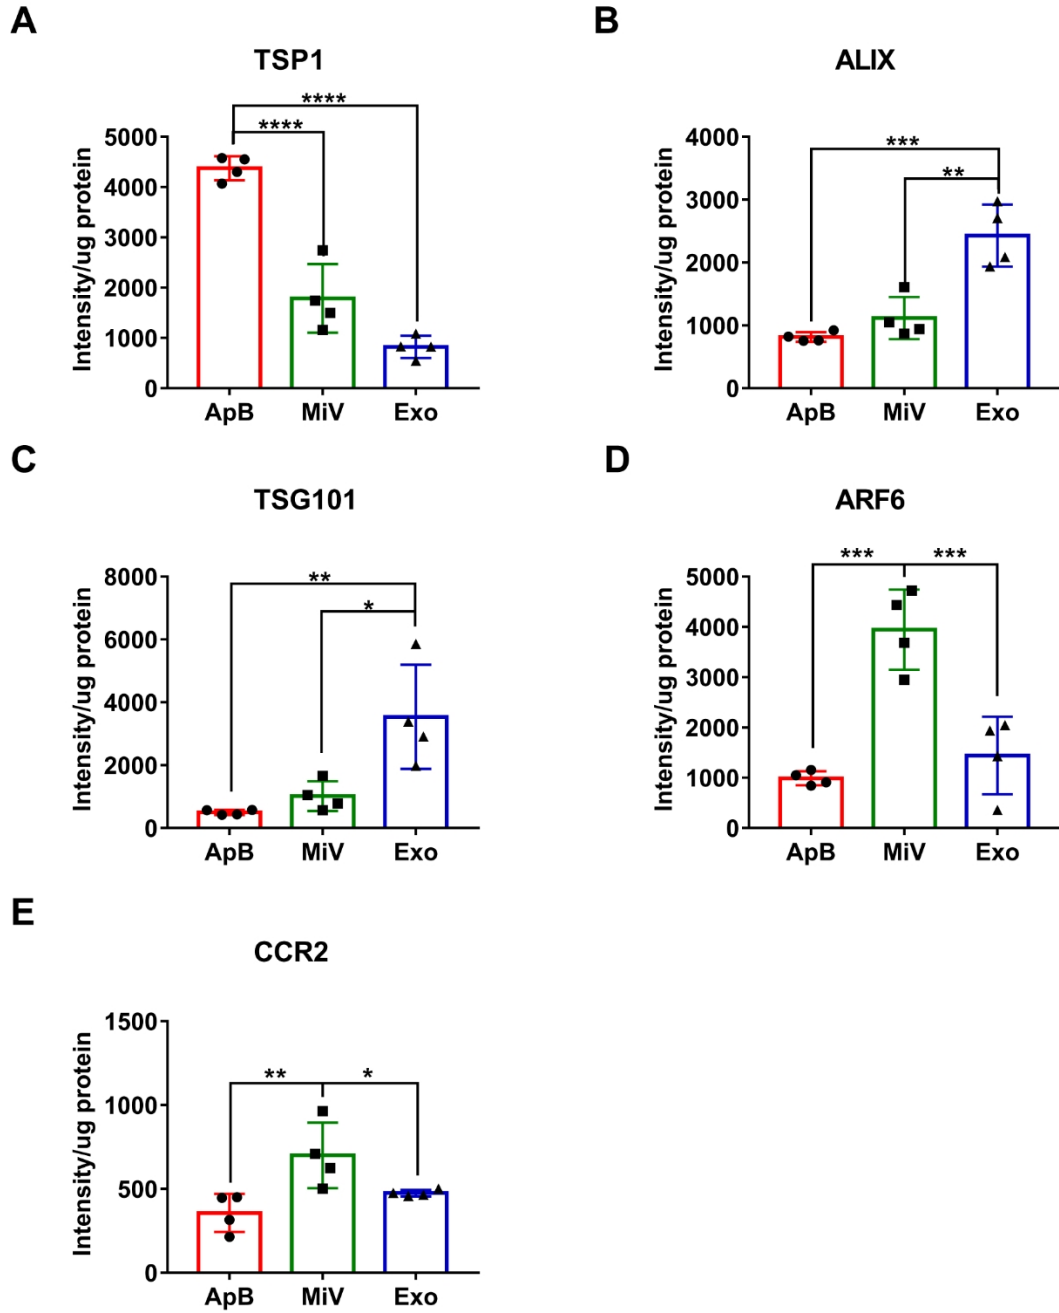

**Figure S1.** (A-E) Quantitative protein expression levels of EV subtypes by western blotting analysis (n = 4). The data were shown as mean  $\pm$  s.d., \* was  $p < 0.05$ , \*\* was  $p < 0.01$ , \*\*\* was  $p < 0.001$ , \*\*\*\* was  $p < 0.0001$  by one-way ANOVA test.

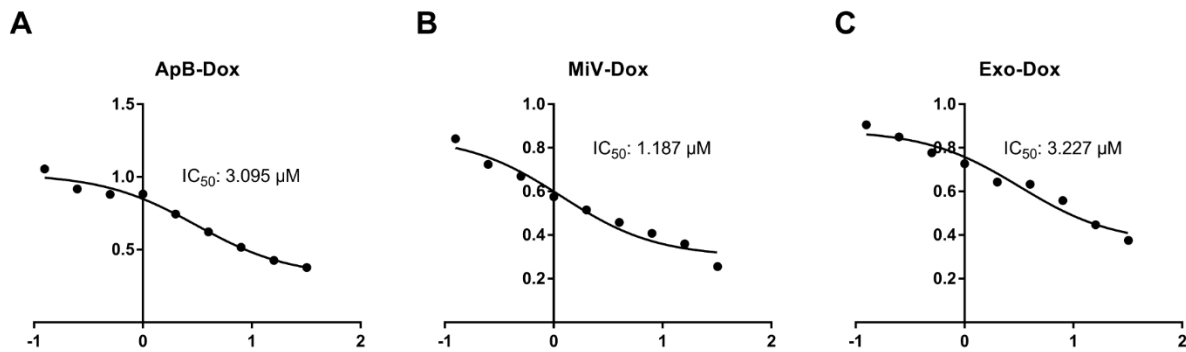

**Figure S2.** The IC<sub>50</sub> value of ApB-Dox, MiV-Dox and Exo-Dox calculated by the GraphPad Prism7 software.

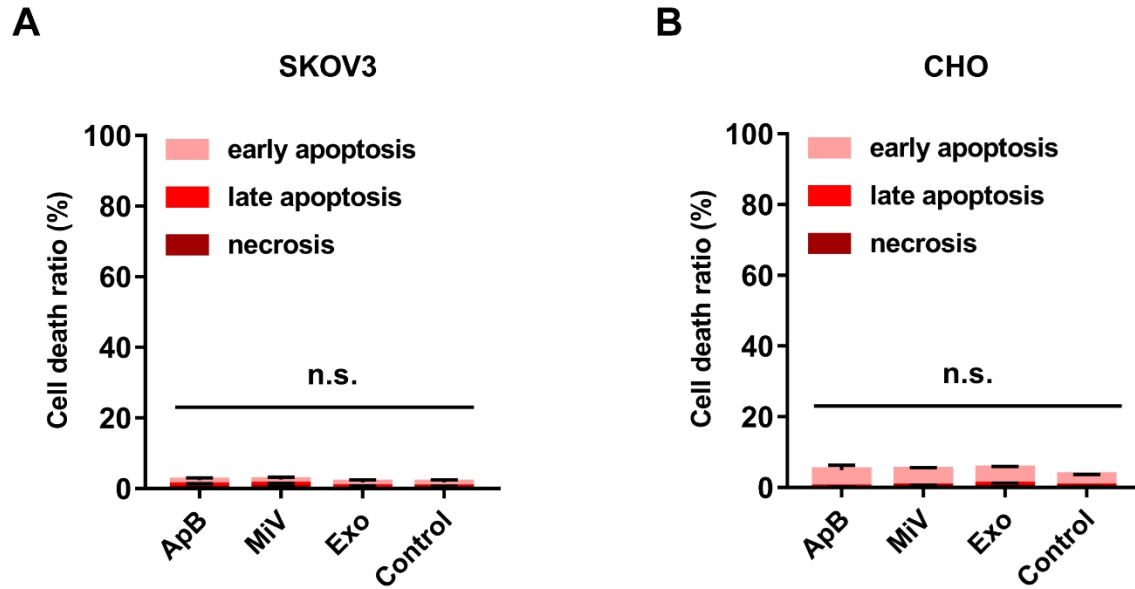

**Figure S3.** Annexin V-FITC/PI assay for apoptosis detection of SKOV3 cells (A) and CHO cells (B) under the treatment of drug-free EVs for 24 h. Quantitative data showed the percentage of early apoptosis, late apoptosis and necrosis cells. The data were shown as mean  $\pm$  s.d., n.s. was  $p > 0.05$  by one-way ANOVA test.

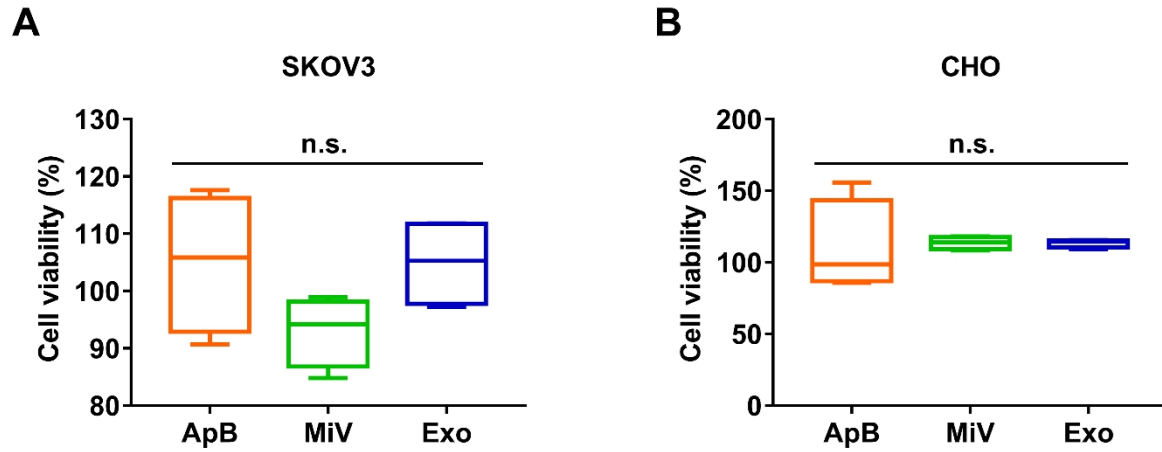

**Figure S4.** Cell viability of SKOV3 cells (A) and CHO cells (B) treated with drug-free EVs for 24 h. The data were shown as mean  $\pm$  s.d., n.s. was  $p > 0.05$  by one-way ANOVA test.

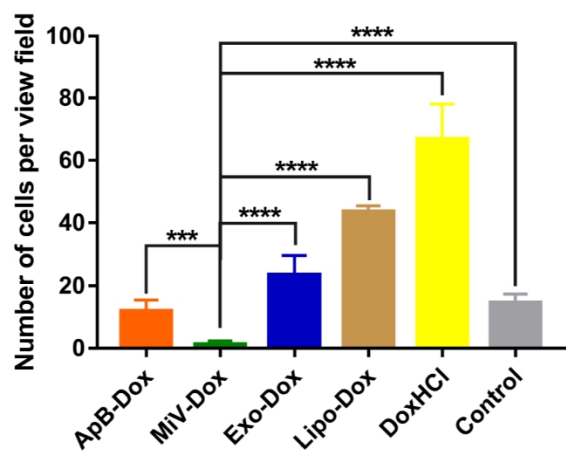

**Figure S5.** Quantification of the number of live cells per each view field from corresponding fluorescence images present in Figure 4I (n = 11). The data were shown as mean  $\pm$  s.d., \*\*\* was  $p < 0.001$ , \*\*\*\* was  $p < 0.0001$  by one-way ANOVA test.

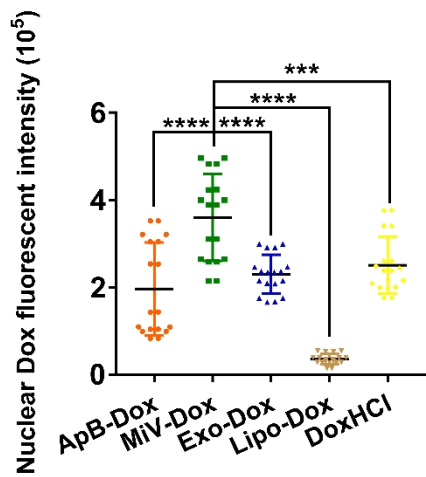

**Figure S6.** The Dox fluorescence signal in SKOV3 nuclei was quantificationally analyzed by ImageJ software (n = 20). The data were shown as mean  $\pm$  s.d., \*\*\* was  $p < 0.001$ , \*\*\*\* was  $p < 0.0001$  by one-way ANOVA test.

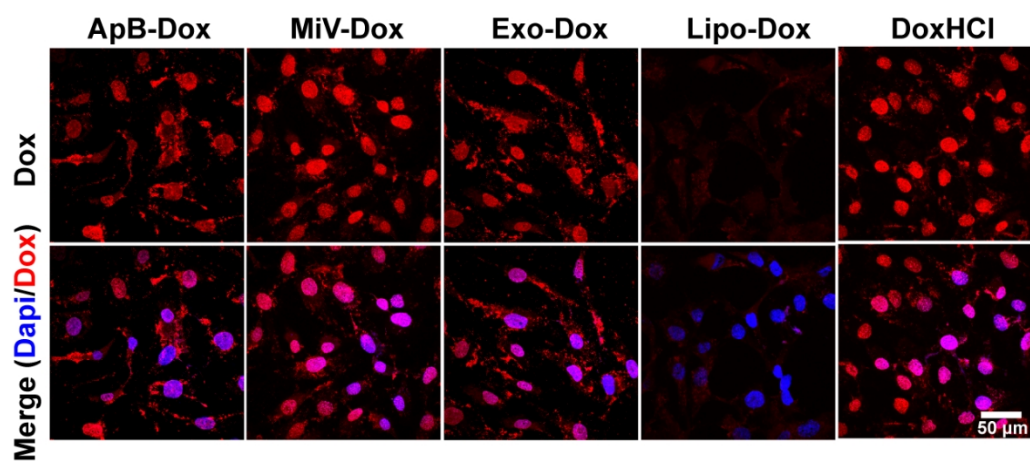

**Figure S7.** Confocal laser scanning microscopy images showed the intracellular distribution of Dox of SKOV3 cells after treated with various formulations at 4 h. The nuclei were stained with DAPI (blue). Dox produced the red fluorescence. The merged images were the overlay of two individual images. Scale bar was 50 μm.



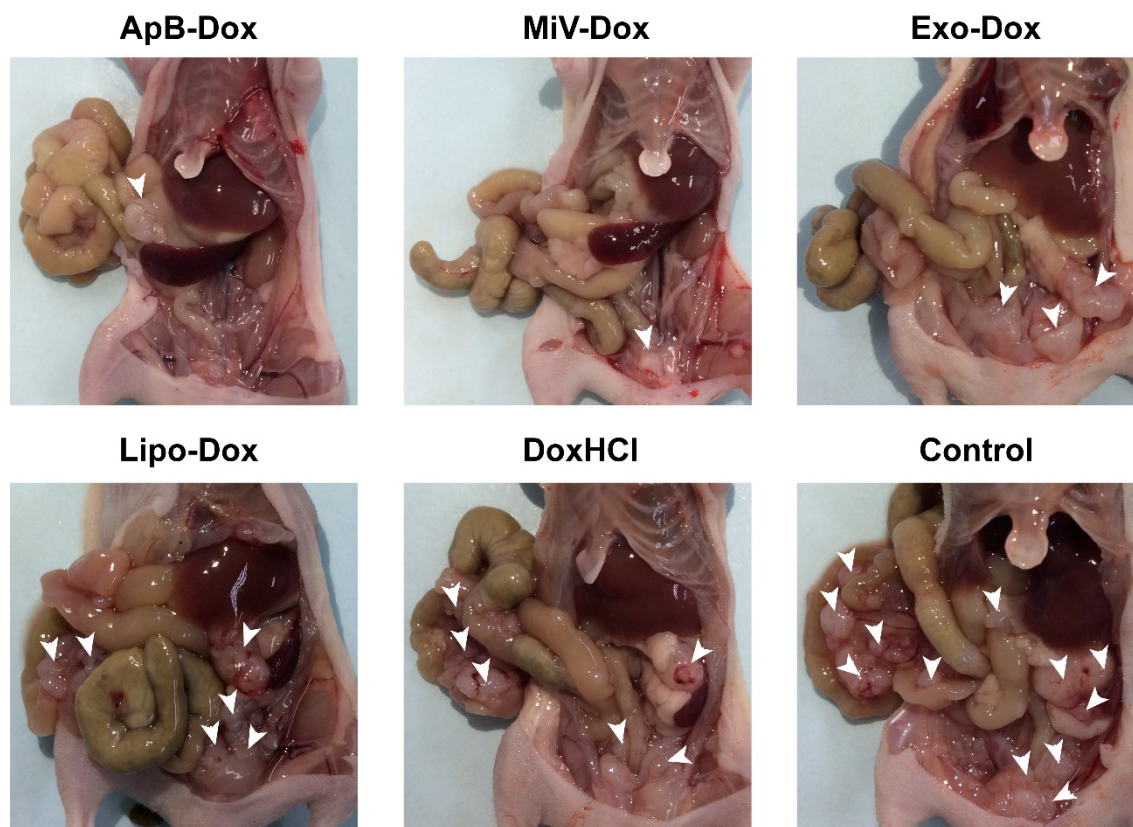

**Figure S8.** Representative microscopic images of peritoneal cavity in mice from six experimental groups on the 28th treatment day. White arrow head indicated tumor nodules.

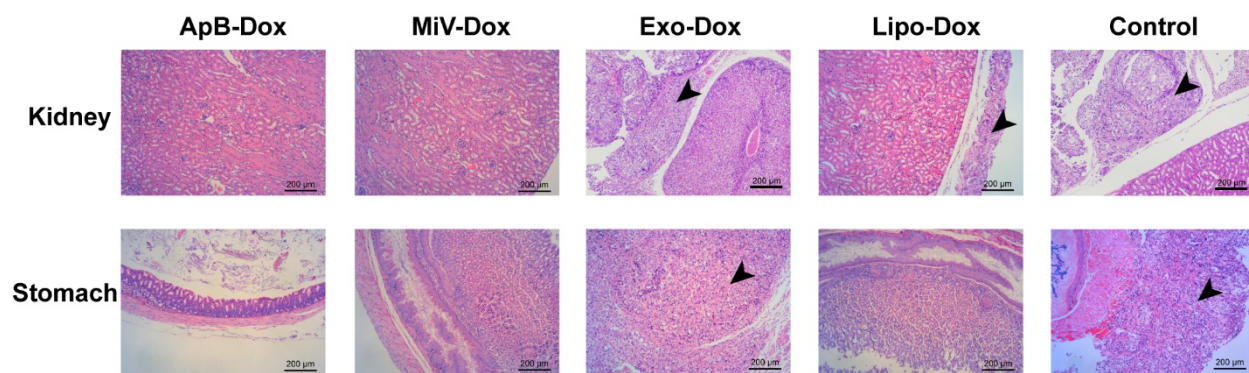

**Figure S9.** H&E stained kidneys and stomachs from control and treated tumor-bearing mice on day 28. Tumor nodules were indicated by arrow heads. Scales bar were shown in each image.

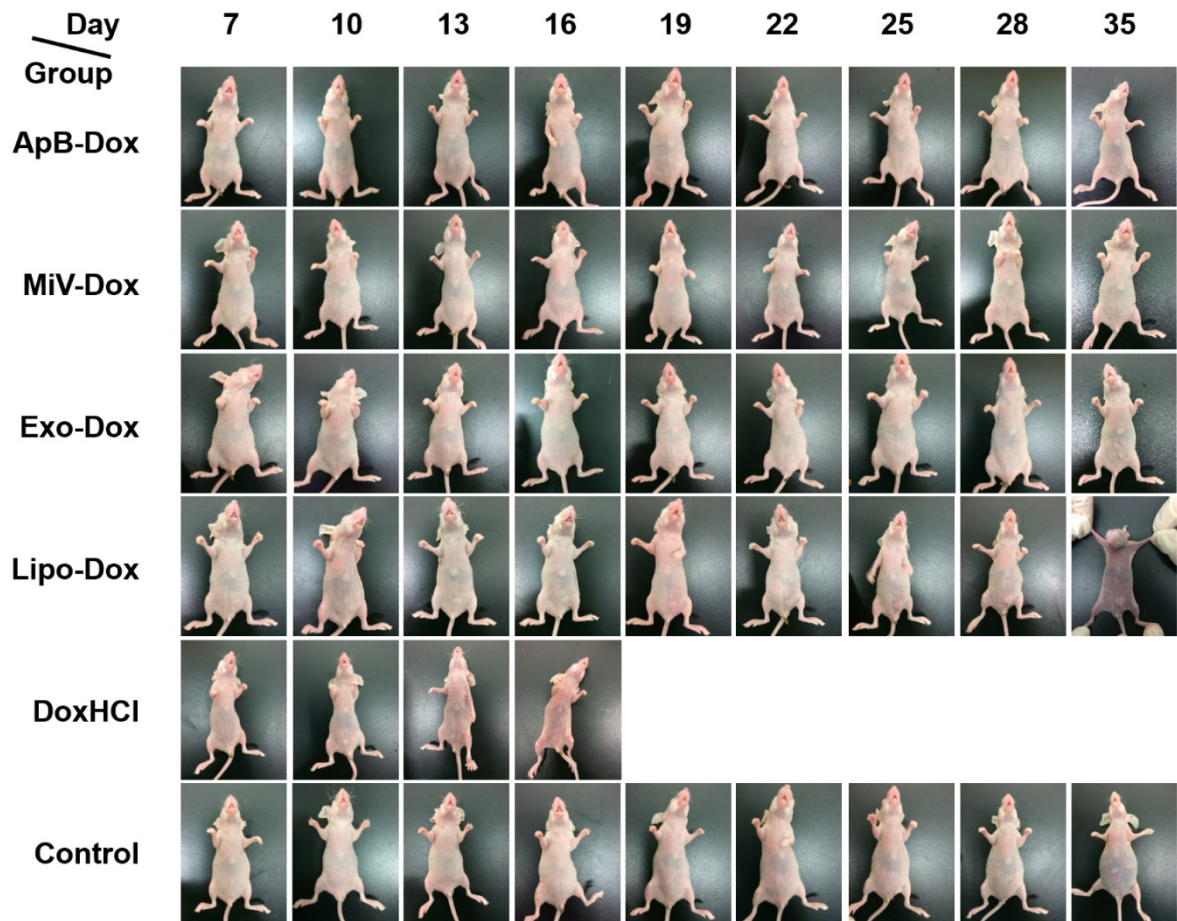

**Figure S10.** *In vivo* safety and toxicity evaluation in mice.  $1 \times 10^7$  SKOV3 cells were injected into the abdomen of the BALB/c nude mice followed by serial imaging studies in 3-days intervals from day 7.

**Table S1.** Encapsulation efficiency (EE) of Dox in each EV subtype.

|        | ApB              | MiV              | Exo              |
|--------|------------------|------------------|------------------|
| EE (%) | $96.70 \pm 0.38$ | $97.69 \pm 0.91$ | $96.95 \pm 1.47$ |
